# Supplementary material for: Elucidating the Glucokinase Activating Potentials of Naturally Occurring Prenylated Flavonoids: An Explicit Computational Approach
Source: MDPI journal article supplement (doi:10.3390/molecules26237211), 2021-11-28
Supplement: s1 [file s1]

**Elucidating the glucokinase activating potentials of naturally occurring prenylated flavonoids: an explicit computational approach**

**Table S1: Prenylated flavonoids and their PubChem IDs**

| S/N | Compounds                 | Pubchem ID |
|-----|---------------------------|------------|
| 1   | 1-methoxyerythrabyssin II | 24761044   |
| 2   | 2'-Methoxykurarinone      | 11982641   |
| 3   | 3'-O-methyldiplacone      | 14539951   |
| 4   | 5-Hydroxysophoranone      | 42607927   |
| 5   | 6-prenylnaringenin        | 155094     |
| 6   | 8-lavandulylkaempferol    | 16083184   |
| 7   | 8-prenylquercetin         | 9799499    |
| 8   | Abyssinin II              | 442457     |
| 9   | Abyssinone IV             | 4063835    |
| 10  | Alopecurone G             | 42607826   |
| 11  | Alpinumisoflavone         | 5490139    |
| 12  | Artelastin                | 399488     |
| 13  | Artelastochromene         | 5471310    |
| 14  | Artobiloxanthone          | 46887866   |
| 15  | Artocarpesin              | 399491     |
| 16  | Artocarpin                | 5458461    |
| 17  | Artoindonesianin_B        | 10096171   |
| 18  | Artoindonesianin P        | 10316935   |
| 19  | Artoindonesianin S        | 5320444    |
| 20  | Artonin E                 | 5481962    |
| 21  | Artonin J                 | 44258663   |
| 22  | Artonin K                 | 15340661   |
| 23  | Artonin L                 | 44258662   |
| 24  | Artonin P                 | 44258658   |
| 25  | Artonin S                 | 44258666   |

|    |                       |           |
|----|-----------------------|-----------|
| 26 | Artonin T             | 44258664  |
| 27 | Artonin U             | 44258358  |
| 28 | Artonin V             | 129687399 |
| 29 | Artonin Y             | 15541482  |
| 30 | Bicolosin A           | 56668791  |
| 31 | Bicolosin B           | 56665359  |
| 32 | Bitucarpin_A          | 21576494  |
| 33 | Bitucarpin B          | 101756926 |
| 34 | Bolusanthol B         | 10594416  |
| 35 | Bolusanthol_C         | 12972420  |
| 36 | Caeruleanone_A        | 102231361 |
| 37 | Caeruleanone B        | 102231362 |
| 38 | Caeruleanone C        | 102231363 |
| 39 | Chaplashin            | 90472917  |
| 40 | Crotafuran A          | 10245439  |
| 41 | Crotafuran E          | 639695    |
| 42 | Cudraflavone B        | 5319925   |
| 43 | Cudraflavone C        | 5319924   |
| 44 | Cycloartobiloxanthone | 10342859  |
| 45 | Cycloartocarpin A     | 44258302  |
| 46 | Cyclocommunin         | 9979523   |
| 47 | Cyclocommunol         | 10315987  |
| 48 | Deoxymiroestrol       | 9927999   |
| 49 | Dereticulatin         | 42607939  |
| 50 | Derrisin              | 10274158  |
| 51 | Desmodianone_D        | 11102162  |
| 52 | Discoloranone_A       | 11995376  |
| 53 | Erybreadin C          | 21147013  |
| 54 | Erybreadin D          | 46880036  |
| 55 | Erythrabyssin II      | 5086400   |
| 56 | Erycristagallin       | 10362969  |
| 57 | Euchrestaflavanone A  | 484588    |

|    |                    |           |
|----|--------------------|-----------|
| 58 | Erylatissin A      | 11739635  |
| 59 | Erylatissin_B      | 11186717  |
| 60 | Erylatissin_C      | 11382659  |
| 61 | Erylatissin G      | 11186717  |
| 62 | Erysenegalensein_N | 49768588  |
| 63 | Erysenegalensein_O | 49768587  |
| 64 | Erystagallin A     | 10410005  |
| 65 | Erysubin E         | 637080    |
| 66 | Erysubin F         | 12051847  |
| 67 | Erythribyssin O    | 46861837  |
| 68 | Erythrinin C       | 44257283  |
| 69 | Eryvarin B         | 101010400 |
| 70 | Eryvarin_D         | 15546808  |
| 71 | Eryvarin_F         | 637295    |
| 72 | Eryvarin N         | 102208346 |
| 73 | Eryvarin O         | 102208347 |
| 74 | Eryzerin_B         | 10862753  |
| 75 | Eryzerin_C         | 10092034  |
| 76 | Eryzerin D         | 11761017  |
| 77 | Euchrenone_b10     | 402594    |
| 78 | Flavenochromane A  | 11351168  |
| 79 | Fremontin          | 5487268   |
| 80 | Hildecarpin        | 442773    |
| 81 | Furowanin_A        | 11582970  |
| 82 | Glabrisoflavone    | 5378945   |
| 83 | Glabrol            | 11596309  |
| 84 | Griffonianone B    | 12972368  |
| 85 | Griffonianone_D    | 11004658  |
| 86 | Griffonianone_F    | 101385741 |
| 87 | Indicanine A       | 54688677  |
| 88 | Indicanine B       | 54712408  |
| 89 | Indicanine C       | 10736576  |

|     |                   |           |
|-----|-------------------|-----------|
| 90  | Indicanine E      | 636496    |
| 91  | Isocyclomulberrin | 5316260   |
| 92  | Isokurarinone     | 5318581   |
| 93  | Isosophoranone    | 10478290  |
| 94  | Isoxanthohumol    | 513197    |
| 95  | Khonklonginol B   | 44179864  |
| 96  | Khonklonginol C   | 44179860  |
| 97  | Khonklonginol D   | 44179865  |
| 98  | Khonklonginol E   | 44179861  |
| 99  | Khonklonginol G   | 44178660  |
| 100 | Khonklonginol H   | 44179862  |
| 101 | Kraussianone 3    | 102510321 |
| 102 | Kuraridine        | 9954815   |
| 103 | Kuraridinol       | 5318880   |
| 104 | Kurarinone        | 11982640  |
| 105 | Kushenol A        | 44563121  |
| 106 | Kushenol B        | 5318891   |
| 107 | Kushenol C        | 5481237   |
| 108 | Kushenol D        | 5318893   |
| 109 | Kushenol E        | 127234    |
| 110 | Kushenol G        | 44259516  |
| 111 | Kushenol I        | 20832634  |
| 112 | Kushenol K        | 5318897   |
| 113 | Kushenol L        | 21721878  |
| 114 | Kushenol N        | 381851    |
| 115 | Kushenol P        | 10742453  |
| 116 | Kushenol R        | 10835998  |
| 117 | Kushenol T        | 10598514  |
| 118 | Kushenol U        | 11796501  |
| 119 | Kushenol V        | 10572194  |
| 120 | Kushenol W        | 42608033  |
| 121 | Kushenol X        | 10599228  |

|     |                    |          |
|-----|--------------------|----------|
| 122 | Kuwanon C          | 5481958  |
| 123 | Kuwanon A          | 44258296 |
| 124 | Kuwanon B          | 44258295 |
| 125 | Kuwanon F          | 156149   |
| 126 | Kuwanon S          | 6450924  |
| 127 | Kuwanon T          | 15231527 |
| 128 | Kuwanon_U          | 46209782 |
| 129 | Laburnetin         | 15237156 |
| 130 | Leachianone A      | 44593449 |
| 131 | Leachianone G      | 5275227  |
| 132 | Lespecyrтин E3     | 25208431 |
| 133 | Lespecyrтин E5     | 25208432 |
| 134 | Lespeflorin G5     | 25227611 |
| 135 | Lespeflorin G10    | 25242998 |
| 136 | Lupiwighteone      | 5317480  |
| 137 | Manuifolin F       | 10596805 |
| 138 | Manuifolin H       | 10596805 |
| 139 | Millewanin E       | 11407932 |
| 140 | Millewanin G       | 11662094 |
| 141 | Millewanin H       | 11597321 |
| 142 | Lupalbigenin       | 10001388 |
| 143 | Lupinifolin        | 10250777 |
| 144 | Morusin            | 5281671  |
| 145 | Norkurarinol A     | 44563159 |
| 146 | Nymphaenol A       | 639465   |
| 147 | Obovatin           | 13940733 |
| 148 | Papyriflavonol A   | 10343070 |
| 149 | Phaseollidin       | 119268   |
| 150 | Puemiricarpene     | 10089353 |
| 151 | Pomiferin          | 4871     |
| 152 | Pumilaisoflavone A | 14035924 |
| 153 | Pumilaisoflavone B | 14035925 |

|     |                      |           |
|-----|----------------------|-----------|
| 154 | Rautandiol A         | 11674519  |
| 155 | Rotenone             | 6758      |
| 156 | Sanggenon K          | 44559964  |
| 157 | Sanggenon N          | 42608044  |
| 158 | Secundifloran        | 10091530  |
| 159 | Senegalensin         | 124035    |
| 160 | Sigmoidin A          | 73204     |
| 161 | Sophoflavescenol     | 9929189   |
| 162 | Sophoraflavanone A   | 6475921   |
| 163 | Sophoflavanone K     | 16083183  |
| 164 | Sophoraflavanone G   | 72936     |
| 165 | Sophoranone          | 441767    |
| 166 | Sophorapterocarpin A | 14017299  |
| 167 | Tetrapterol F        | 100935759 |
| 168 | Tetrapterol H        | 100935760 |
| 169 | Tetrapterol I        | 100935761 |
| 170 | Tomentodiplacone     | 24861959  |
| 171 | Tomentodiplacone B   | 24861960  |
| 172 | Tomentodiplacone     | 24861959  |
| 173 | Triquetrumone A      | 102216287 |
| 174 | Kuwanon E            | 6440408   |
| 175 | Propolin A           | 10411087  |
| 176 | Schizolaenone C      | 46871853  |
| 177 | 6-Geranylchrysin     | 5281943   |
| 178 | Alpinumisoflavone    | 5490139   |
| 179 | Arcommunol B         | 101781179 |
| 180 | Artoheterophyllin H  | 102133563 |
| 181 | Atalantoflavone      | 14162621  |
| 182 | Bavachin             | 14236566  |
| 183 | Broussoflavonol A    | 21676157  |
| 184 | Broussoflavonol B    | 480828    |
| 185 | Candenatenin F       | 44254971  |

|     |                    |           |
|-----|--------------------|-----------|
| 186 | Cannflavin A       | 10071695  |
| 187 | Carpachromene      | 10449654  |
| 188 | Cyclomulberrin     | 11742872  |
| 189 | Dalvelutinane A    | 132497058 |
| 190 | Dalvelutinane B    | 132497059 |
| 191 | Discoloranone      | 11995377  |
| 192 | Glyasperin F       | 392442    |
| 193 | Heminitidulan      | 629585    |
| 194 | Hiravanone         | 14542255  |
| 195 | Honyucitrin        | 44257865  |
| 196 | Icaritin           | 5318980   |
| 197 | Isodiscoloranone A | 11995289  |
| 198 | Khonklonginol A    | 44179863  |
| 199 | Leiocin            | 630752    |
| 200 | Leiocinol          | 596540    |
| 201 | Licoagroisoflavone | 636883    |
| 202 | Lonchocarpusone    | 44559034  |
| 203 | Maackiapentone     | 25231268  |
| 204 | Macaranone B       | 42642846  |
| 205 | Nitidulin          | 630902    |
| 206 | Neobavaisoflavone  | 5320053   |
| 207 | Podoverine A       | 13911680  |
| 208 | Sanggenon A        | 156707    |
| 209 | Schizolaenone C    | 46871853  |
| 210 | Sanggenon M        | 44559964  |
| 211 | Sinoflavonoid A    | 77106371  |
| 212 | Sinoflavonoid B    | 77106372  |
| 213 | Ulexone A          | 14583600  |
| 214 | Vogelin C          | 44448192  |
| 215 | Vogelin D          | 636894    |
| 216 | Vogelin E          | 10904337  |
| 217 | Vogelin F          | 11143123  |

|     |           |           |
|-----|-----------|-----------|
| 218 | Vogelin G | 11026226  |
| 219 | Vogelin H | 101396887 |
| 220 | Vogelin I | 101396888 |
| 221 | Yukovanol | 14542257  |

### Supplementary File S1

Formulas used for quantum chemical calculations.

$$\Delta E = E_{LUMO} - E_{HOMO} \quad (1)$$

$$\eta = \frac{1}{2}(E_{LUMO} - E_{HOMO}) \quad (2)$$

$$\mu = \frac{1}{2}(E_{HOMO} + E_{LUMO}) \quad (3)$$

$$\omega = \frac{\mu^2}{2\eta} \quad (4)$$
